# Supplementary material for: Attitude and Practices of District-level HMIS Managers Towards Malaria Routine Reporting in Uganda: A 2024 Cross-sectional Study
Source: Research Square preprint supplement (doi:10.21203/rs.3.rs-7712735/v1), 2025-11-19
Supplement: Supplementary file 1 [file 2f47286a6a5e207bf6da6b33.docx]

**Additional file**

Exploration of association between attitude and practice outcomes and district status or participant demographic factors. Without any factors showing closeness to being significantly associated with the outcome, the adjusted model included all the factors considered for crude associations assessment that had a determinate estimate. Four key outcomes were considered in this assessment, including 1) regularity of conducting analysis of data collected from by the DHM office (Table 1). 2) Time point into the new month at which DHM HMIS managers get in touch with health facilities that delayed to submit their reports (Table 2). 3) Whether or not data issues identified after reviewing data reports received from health facilities were documented (Table 3). 4) Whether or not the record of data queries raised from DHI following submission of data into DHIS-2 was made available to the study teams (Table 4).

**Table 1. Factors associated with how often district officials would like to conduct analysis of the data they collect and oversee**

| **Factor** | Univariate | | | Adjusted | | |
| --- | --- | --- | --- | --- | --- | --- |
| **Odds Ratio** | **95% CI** | **P-value** | **Odds Ratio** | **95% CI** | **P-value** |
| ***How often you would like to perform analysis of data collected by the DHM office? (0=Monthly or more, 1=Quarterly)*** | | | | | | |
| **District status**  Rural  Urban | 1  4.2 | -  0.80 – 32.72 | 0.114 | 1  3.75 | -  0.52 – 41.80 | 0.218 |
| **Participant cadre**  HMIS Focal person  District biostatistician | 1  0.42 | -  0.07 – 2.13 | 0.301 | 1  0.75 | -  0.06 – 7.89 | 0.808 |
| **Participant education**  Under-graduate  Graduate and more | 1  0.75 | -  0.16 – 3.47 | 0.709 | 1  0.96 | -  0.11 – 9.76 | 0.976 |
| **Participant gender**  Male  Female | 1  0.63 | 0.14 – 2.64 | 0.525 | 1  0.74 | -  0.14 – 3.74 | 0.714 |
| **Participant age**  <=30 yrs  >30 & <=45 yrs  >45 & <=60 yrs | 1  0.44  1.12 | -  0.07 – 2.54  0.11 – 13.21 | 0.358  0.921 | 1  0.33  1.06 | -  0.03 – 2.62  0.06 – 20.39 | 0.297  0.966 |

Crude results suggest a pattern of urban DHM participants having higher odds of conducting analysis at a lower regularity of quarterly than their rural counterparts (Table 1). In the results, biostatisticians, higher education status, and female gender were each less likely to opt for quarterly analysis frequency relative to HMIS focal person, undergraduate and male gender, respectively. However, all these were not statistically significant. After adjusting to position held, education level, gender, and age, urban DHM participants still tended towards higher odds of opting for quarterly rather higher frequency of analysis performance, though still not significant.

**Table 2. Factors associated with time of getting in touch with health facilities when reporting is delayed**

| **Factor** | Univariate | | | Adjusted | | |
| --- | --- | --- | --- | --- | --- | --- |
| **Odds Ratio** | **95% CI** | **P-value** | **Odds Ratio** | **95% CI** | **P-value** |
| ***When do you get in touch with health facilities when reports are delayed? (0=5-10days / 1=>10days)*** | | | | | | |
| **District status**  Rural  Urban | 1  0.90 | -  0.20 – 4.34 | 0.891 | 1  1.73 | -  0.28 – 13.50 | 0.570 |
| **Participant cadre**  HMIS Focal person  District biostatistician | 1  1.00 | -  0.19 – 5.83 | 1.000 | 1  1.90 | -  0.20 – 23.43 | 0.626 |
| **Participant education**  Under-graduate  Graduate and more | 1  0.50 | -  0.11 – 2.28 | 0.366 | 1  0.74 | -  0.07 – 6.79 | 0.781 |
| **Participant gender**  Male  Female | 1  0.83 | -  0.19 – 3.40 | 0.800 | 1  0.55 | -  0.10 – 2.66 | 0.462 |
| **Participant age**  <=30 yrs  >30 & <=45 yrs  >45 & <=60 yrs | 1  0.62  2.00 | -  0.11 – 3.87  0.20 – 24.34 | 0.594  0.560 | 1  1.16  3.73 | -  0.15 – 11.32  0.25 – 75.24 | 0.890  0.351 |

Whilst none of the factors showed any significant association, it was notable that older age tended towards higher odds of late contact with health facilities for delayed reports, as did urban relative to rural districts and biostatisticians relative to HMIS focal persons, in the adjusted model (Table 2).

**Table 3. Factors associated with documenting the mistakes identified in the data reports from health facilities, when reviewed**

| **Factor** | Univariate | | | Adjusted | | |
| --- | --- | --- | --- | --- | --- | --- |
| **Odds Ratio** | **95% CI** | **P-value** | **Odds Ratio** | **95% CI** | **P-value** |
| ***Do you document the mistakes observed in the data reports you receive and review? (0=No / 1=Yes)*** | | | | | | |
| **District status**  Rural  Urban | 1  3.33 | -  0.62 – 18.57 | 0.155 | 1  2.64 | -  0.42 – 16.90 | 0.292 |
| **Participant education**  Under-graduate  Graduate and more | 1  0.27 | -  0.01 – 1.87 | 0.253 | 1  0.23 | -  0.01 – 2.15 | 0.266 |
| **Participant gender**  Male  Female | 1  0.32 | -  0.05 – 1.59 | 0.171 | 1  0.28 | -  0.03 – 1.71 | 0.185 |
| **Participant age**  <=30 yrs  >30 & <=45 yrs  >45 & <=60 yrs | 1  1.36  1.60 | -  0.16 – 8.83  0.11 – 42.32 | 0.754  0.736 | 1  2.09  1.39 | -  0.19 – 22.85  0.07 – 44.00 | 0.521  0.831 |

Unadjusted results suggest that urban district-level HMIS managers and those who were older were more likely to document mistakes observed in the data reports they received from their health facilities, however both were not statistically significant (Table 3). Nonetheless, the same pattern was observed after adjusting for highest level of education and gender. Moreover, in the crude as with the adjusted model, higher education status as well as female gender, each tended towards being less likely to document observed data mistakes, though neither was statistically significant, either in the crude or adjusted regression model.

**Table 4. Factors associated with availability of record of data queries received from DHI by the district**

| **Factor** | Univariate | | | Adjusted | | |
| --- | --- | --- | --- | --- | --- | --- |
| **Odds Ratio** | **95% CI** | **P-value** | **Odds Ratio** | **95% CI** | **P-value** |
| ***Observation of the log or record of data queries received from DHI? (0=Not observed / 1=Observed)*** | | | | | | |
| **District status**  Rural  Urban | 1  0.51 | -  0.09 – 2.32 | 0.397 | 1  0.46 | -  0.06 – 2.74 | 0.411 |
| **Participant cadre**  HMIS Focal person  District biostatistician | 1  1.40 | -  0.27 – 7.28 | 0.681 | 1  0.72 | -  0.07 – 6.51 | 0.771 |
| **Participant education**  Under-graduate  Graduate and more | 1  1.67 | -  0.37 – 7.65 | 0.502 | 1  1.54 | -  0.18 – 14.80 | 0.687 |
| **Participant gender**  Male  Female | 1  1.47 | -  0.37 – 6.30 | 0.589 | 1  1.66 | -  0.36 – 8.42 | 0.522 |
| **Participant age**  <=30 yrs  >30 & <=45 yrs  >45 & <=60 yrs | 1  0.58  0.27 | -  0.07 – 3.68  0.02 – 2.82 | 0.560  0.286 | 1  0.55  0.28 | -  0.06 – 4.06  0.01 – 4.14 | 0.571  0.362 |

With respect to apparent willingness to provide the record of DHI queries, none of the factors showed a significant association. However, it was noteworthy that urban DHM participants, older age and biostatistician cadre were less willing and/or able to provide these logs, in the adjusted model as shown in Table 4 above.
